# Supplementary material
Source: PubMed Central journal article supplement (PMC4286364)
Supplement: NIHMS614934-supplement-1.pdf [file NIHMS614934-supplement-1.pdf]

## Supplemental Results

### Longitudinal changes in block and event-related fMRI task performance during childhood

We analyzed behavioral data from the longitudinal block ( $N = 28$ ) and event-related ( $N = 20$ ) fMRI experiments separately. We first conducted a 2-by-2 analysis of variance (ANOVA) with Time (Time-1 vs. Time-2) and Condition (Addition vs. Control) as within-subject factors to analyze longitudinal changes in accuracy data from 28 children in the block fMRI task. This analysis revealed significant main effect of Condition ( $F(1, 27) = 13.04, P < 0.001$ ), but no main effect of Time ( $F(1, 27) = 0.51, P = 0.48$ ). Follow-up tests revealed generally lower accuracy for solving Addition than Control problems (Time-1:  $t(27) = -2.74, P = 0.01$ ; Time-2,  $t(27) = -3.56, P = 0.001$ )(**Fig. S1a**). There is no significant interaction between Time and Condition ( $F(1, 27) = 0.38, P = 0.54$ ) for accuracy in the block fMRI experiment. We then conducted another 2-by-2-ANOVA for reaction times (RTs) for the block fMRI task. This analysis revealed significant main effects of Condition ( $F(1, 27) = 46.67, P < 0.001$ ) and Time ( $F(1, 27) = 14.82, P = 0.001$ ). Follow-up tests revealed that children showed generally slower response in solving Addition than Control problems (Time-1:  $t(27) = -4.64, P < 0.001$ ); Time-2:  $t(27) = -6.10, P < 0.001$ ), and they became faster at Time-2 than Time-1 in solving problems (Addition:  $t(27) = 2.65, P = 0.013$ ; Control:  $t(27) = 4.45, P < 0.001$ ) (**Fig. S1c**). We did not observe significant interaction effect between Condition and Time ( $F(1,27) = 0.90, P = 0.35$ ).

For the longitudinal event-related fMRI experiment, one 2-by-2 ANOVA for accuracy data revealed significant main effect of Condition ( $F(1, 19) = 46.24, P < 0.001$ ) and marginally significant main effect of Time ( $F(1, 19) = 3.07, P = 0.096$ ). Follow-up tests revealed that children showed generally lower accuracy in solving Addition than Control problems (Time-1:  $t(19) = -5.23, P < 0.001$ ); Time-2:  $t(19) = -5.23, P < 0.001$ ). Critically, we observed significant interaction effect between Condition and Time ( $F(1,19) = 4.97, P = 0.038$ ). Follow-up tests revealed significantly larger longitudinal improvement in accuracy in solving Addition ( $t(19) =$

2.50,  $P = 0.022$ ) relative to Control ( $t(19) = 0.68$ ,  $P = 0.50$ ) problems (**Fig. S1b**). We then conducted another 2-by-2 ANOVA for RT data revealed significant main effects of Condition ( $F(1, 19) = 79.74$ ,  $P < 0.001$ ) and Time ( $F(1, 19) = 28.43$ ,  $P < 0.001$ ). Follow-up tests revealed that children responded generally slower in solving Addition than Control problems (Time-1: ( $t(19) = -9.29$ ,  $P < 0.001$ ); Time-2: ( $t(19) = -6.87$ ,  $P < 0.001$ ), and they became faster at Time-2 than Time-1 for solving problems (Addition and Control:  $t(19) > 4.63$ ,  $P < 0.001$ ). Again, we observed significant interaction effect between Condition and Time ( $F(1,19) = 5.67$ ,  $P = 0.028$ ). Follow-up tests revealed significantly larger longitudinal improvement in RTs when solving Addition ( $t(19) = 5.63$ ,  $P < 0.001$ ) relative to Control ( $t(19) = 4.34$ ,  $P < 0.001$ ) problems (**Fig. S1d**).

### **Cross-sectional developmental changes in block and event-related fMRI task performance from childhood through adolescence into adulthood**

We then examined cross-sectional changes in accuracy and RTs during solving addition problems across children at Time-2, adolescents and adults in the block and event-related fMRI tasks. We conducted a 2-by-3 ANOVA with Condition as within-subject factor and Group as between-subject factor for accuracy data from the block fMRI task. This revealed significant main effects of Condition ( $F(1, 65) = 8.14$ ,  $P < 0.001$ ) and Group ( $F(2, 65) = 9.15$ ,  $P < 0.001$ ). Post-hoc Scheffe's tests for the Group effect revealed significant cross-sectional improvement in accuracy from childhood through adolescence into adulthood, with higher accuracy in Adolescents ( $P = 0.001$ ) and Adults ( $P = 0.006$ ) than Children but no difference between Adolescents and Adults ( $P = 0.90$ ). Critically, we observed significant interaction between Group and Condition ( $F(2,65) = 6.26$ ,  $P = 0.003$ ). Follow-up Scheffe's tests in two one-way ANOVAs separately for Addition and Control conditions revealed relatively larger cross-sectional improvement in solving Addition (Children < Adolescence:  $P < 0.001$ ; Children < Adults:  $P <$

0.001) relative to Control (Children < Adolescence:  $P = 0.013$ ; Children < Adults:  $P = 0.093$ ) problems from childhood through adolescence into adulthood (**Fig. S1a**).

Similarly, we conducted a 2-by-3 ANOVA for RT data from the block fMRI task. This analysis revealed significant main effects of Group ( $F(2, 65) = 53.14, P < 0.001$ ) and Condition ( $F(1, 65) = 56.72, P < 0.001$ ). Post-hoc tests using Scheffe's procedure revealed significant cross-sectional improvement in RTs from childhood through adolescence into adulthood, with faster RTs in Adolescents ( $P < 0.001$ ) and Adults ( $P < 0.001$ ) than Children but no difference between Adolescents and Adults ( $P = 0.326$ ). Critically, we observed significant interaction between Group and Condition ( $F(2,65) = 9.14, P < 0.001$ ). Post-hoc tests using Scheffe's procedure in two one-way ANOVAs separately for Addition and Control conditions revealed relatively larger cross-sectional improvement in RTs solving Addition (Children < Adolescence:  $P < 0.001$ ; Children < Adults:  $P < 0.001$ ) relative to Control problems (Children < Adolescence:  $P = 0.001$ ; Children < Adults:  $P = 0.001$ ) from childhood through adolescence into adulthood (**Fig. S1b**).

For the event-related fMRI task, we first conducted a 2-by-3 ANOVA for accuracy with Condition as within-subject factor and Group as between-subject factor. Consistent with accuracy in the block fMRI, we observed significant main effects of Group ( $F(2, 57) = 12, P = 0.001$ ) and Condition ( $F(1, 65) = 25.09, P < 0.001$ ). Post-hoc tests using Scheffe's procedure for the Group effect revealed significant cross-sectional improvement in accuracy from childhood through adolescence into adulthood, with higher accuracy in Adolescents ( $P = 0.001$ ) and Adults ( $P = 0.006$ ) than Children but no difference between Adolescents and Adults ( $P = 0.90$ ). Critically, we observed significant interaction between Group and Condition ( $F(2,65) = 6.26, P = 0.003$ ). Post-hoc tests using Scheffe's procedure in two one-way ANOVAs separately for Addition and Control conditions revealed relatively larger cross-sectional improvement in solving Addition (tests for Children < Adolescents:  $P < 0.001$ ; Children < Adults:  $P < 0.001$ ) relative to Control

(Scheffe's tests for Children < Adolescence:  $P = 0.013$ ; Children < Adults:  $P = 0.093$ ) problems from childhood through adolescence into adulthood (**Fig. S1c**).

Similarly, we conducted a 2-by-3 ANOVA for RT data from the event-related fMRI task. This analysis revealed significant main effects of Group ( $F(2, 57) = 126.50, P < 0.001$ ) and Condition ( $F(1, 57) = 178.21, P < 0.001$ ). Post-hoc tests using Scheffe's procedure revealed significant cross-sectional improvement in RTs from childhood through adolescence into adulthood, with faster RTs in Adolescents ( $P < 0.001$ ) and Adults ( $P < 0.001$ ) than Children, marginally faster RTs in Adolescents than Adults ( $P = 0.092$ ). Critically, we observed very significant interaction between Group and Condition ( $F(2,57) = 27.83, P < 0.001$ ). Post-hoc tests using Scheffe's procedure separately for Addition and Control conditions revealed relatively larger cross-sectional improvement in RTs solving Addition (Children < Adolescence:  $P < 0.0001$ ; Children < Adults:  $P < 0.0001$ ) relative to Control problems (Children < Adolescence:  $P < 0.001$ ; Children < Adults:  $P < 0.001$ ) from childhood through adolescence into adulthood (**Fig. S1d**).

**Supplementary Tables: S1 to S9****Table S1: Participant demographics and neuropsychological assessments.**

|                   | Longitudinal fMRI |                | Cross-sectional fMRI |                | <i>P</i> |
|-------------------|-------------------|----------------|----------------------|----------------|----------|
|                   | Children T1       | Children T2    | Adolescents          | Adults         |          |
| N (M/F)           | 28 (15/13)        | 28 (15/13)     | 20 (11/9)            | 20 (8/12)      | 0.40     |
| Age               | 8.26 ± 0.53       | 9.45 ± 0.88    | 15.61 ± 1.40         | 20.50 ± 1.07   | <0.001   |
| (Range)           | (7 - 9)           | (9 - 11)       | (14 - 17)            | (19 - 22)      |          |
| Performance IQ    | 110.76 ± 12.57    | -              | 112.35 ± 6.88        | 115.95 ± 10.28 | 0.32     |
| Verbal IQ         | 112.13 ± 11.70    | -              | 117.20 ± 10.12       | 122.25 ± 10.33 | 0.09     |
| Full IQ           | 114.32 ± 8.93     | -              | 116.80 ± 6.51        | 120.50 ± 8.85  | 0.10     |
| Word reading      | 111.46 ± 12.41    | 108.04 ± 13.05 | 111.70 ± 4.62        | 111.58 ± 9.31  | 0.67     |
| Math reasoning    | 110.57 ± 13.21    | 114.2 ± 12.71  | 113.7 ± 11.60        | 114.95 ± 8.45  | 0.38     |
| Number operations | 104.48 ± 13.10    | 109.37 ± 13.93 | 118.25 ± 9.45        | 116.47 ± 5.31  | 0.02     |

Mean (± standard deviation) of age, IQ, word reading, math reasoning and number operation measurements for all participants is shown. *P* values represent the significance of comparisons between children (Time-2), adolescent and adults. Notes: N, number of participants; T1, Time-1; T2, Time-2; - data not collected.

**Table S2: Brain regions involved in addition problem solving in children.**

| Brain region                                           | R/L      | BA       | T values    | MNI (x, y, z)     |
|--------------------------------------------------------|----------|----------|-------------|-------------------|
| Addition > Control collapsing across Time-1 and Time-2 |          |          |             |                   |
| Inferior frontal gyrus                                 | L        | 47       | 4.24        | -32 16 -2         |
|                                                        | R        |          | 4.07        | 40 20 -8          |
| Dorsolateral PFC                                       | L        | 9        | 4.16        | -38 20 26         |
|                                                        | R        |          | 4.10        | 40 20 22          |
| Insula                                                 | L        | 13       | 4.08        | -38 14 10         |
|                                                        | R        |          | 4.20        | 40 16 10          |
| Dorsal ACC                                             | L        | 6        | 3.76        | -2 6 56           |
| <b>Hippocampus</b>                                     | <b>L</b> | <b>-</b> | <b>4.27</b> | <b>-20 -40 -4</b> |
|                                                        |          |          | <b>2.93</b> | <b>-20 -36 -2</b> |
|                                                        | <b>R</b> | <b>-</b> | <b>3.64</b> | <b>24 -38 0</b>   |
|                                                        |          |          | <b>2.74</b> | <b>30 -20 -16</b> |
| Inferior parietal lobe                                 | L        | 40       | 3.10        | -46 -48 46        |
|                                                        |          |          | 3.06        | -36 -60 44        |
| Lingual gyrus                                          | L        | 18       | 4.07        | 20 -100 0         |
| Striatum                                               | L        | -        | 3.53        | -18 -2 2          |
| Midbrain                                               | R        | -        | 4.69        | 12 -30 -18        |
| Cerebellum                                             | L        | -        | 3.22        | -4 -52 -18        |

Only clusters, significant at a height threshold of  $p < 0.01$  and an extent threshold of  $p < 0.05$  corrected for multiple comparisons, are reported with local maxima in Montreal Neurological Institute (MNI) space. Clusters in the medial temporal lobe are in bold. Notes: BA, Brodmann's area; L, left hemisphere; R, right hemisphere; ACC, anterior cingulate cortex; PFC, prefrontal cortex; -, no proper data.

**Table S3: Brain regions showing longitudinal changes in task-related activation during addition problem solving in children.**

| Brain regions             | R/L      | BA   | T values    | MNI (x, y, z)      |
|---------------------------|----------|------|-------------|--------------------|
| Children: Time-2 > Time-1 |          |      |             |                    |
| <b>Hippocampus</b>        | <b>L</b> | -    | <b>3.64</b> | <b>-26 -24 -16</b> |
|                           |          |      | <b>3.03</b> | <b>-16 -20 -18</b> |
|                           | <b>R</b> |      | <b>3.90</b> | <b>28 -18 -18</b>  |
|                           |          |      | <b>3.72</b> | <b>32 -14 -20</b>  |
| Cerebellum                | R        | -    | 3.88        | 20 -68 -22         |
| Children: Time-1 < Time-2 |          |      |             |                    |
| Dorsolateral PFC          | L        | 8, 9 | 4.43        | -44 18 52          |
|                           |          |      | 3.12        | -32 30 50          |
|                           | R        |      | 3.42        | 40 22 54           |
|                           |          |      | 3.40        | 48 14 36           |
| Angular gyrus             | R        | 39   | 4.00        | 44 -72 26          |
| Superior parietal lobe    | L        | 7    | 3.64        | -22 -64 64         |

Notes are same as in Table S2.

**Table S4: Brain regions showing longitudinal changes in task-related hippocampal functional connectivity and relations with individual gains in retrieval fluency in children.**

| Brain regions                                                                                     | R/L | BA | T values | MNI (x, y, z) |
|---------------------------------------------------------------------------------------------------|-----|----|----------|---------------|
| Functional connectivity: Children Time-2 > Time-1                                                 |     |    |          |               |
| vmPFC                                                                                             | R   | 10 | 4.78     | 4 38 -2       |
|                                                                                                   |     |    | 4.28     | 8 50 -2       |
| Inferior frontal gyrus                                                                            | L   | 47 | 3.44     | -50 24 2      |
|                                                                                                   |     |    | 3.19     | -42 28 8      |
| Anterior temporal lobe                                                                            | L   | 38 | 3.92     | -50 12 -10    |
|                                                                                                   |     |    | 3.54     | -54 16 -12    |
| Positive correlation with individual gains in retrieval fluency in children from Time-1 to Time-2 |     |    |          |               |
| Dorsolateral PFC                                                                                  | R   | 46 | 5.09     | 46 32 40      |
|                                                                                                   |     |    | 3.81     | 44 42 34      |
|                                                                                                   | L   | 46 | 3.87     | -34 42 42     |
|                                                                                                   |     |    | 3.84     | -30 40 40     |
| Inferior parietal sulcus                                                                          | L   | 7  | 3.86     | -30 -68 54    |
|                                                                                                   |     |    | 3.17     | -30 -76 50    |

Notes are same as in Table S2. PFC, dorsolateral prefrontal cortex; vmPFC, ventromedial prefrontal cortex.



**Table S5: Longitudinal changes in task-related hippocampal functional connectivity with fronto-parietal regions *predict* individual gains in retrieval fluency in children.**

| Brain regions | Correlation | Prediction                                |          |
|---------------|-------------|-------------------------------------------|----------|
|               | <i>r</i>    | <i>r</i> <sub>(predicted, observed)</sub> | <i>p</i> |
| Left DLPFC    | 0.63        | 0.53                                      | <0.001   |
| Right DLPFC   | 0.80        | 0.71                                      | <0.001   |
| Left IPS      | 0.59        | 0.51                                      | =0.001   |

Notes: DLPFC, dorsolateral prefrontal cortex; IPS, inferior parietal sulcus. “Correlation” refers to results from a conventional regression analysis of shared covariance between two variables. “Prediction” refers to the results from a machine learning algorithm with balanced 4-fold cross-validation combined with linear regression (see online Methods).

**Table S6: Brain regions involved in addition problem solving in children, adolescents and adults.**

| Brain regions                             | R/L | BA    | T values | MNI (x, y, z) |
|-------------------------------------------|-----|-------|----------|---------------|
| <b>Children: Addition &gt; Control</b>    |     |       |          |               |
| (see Table S2 above)                      |     |       |          |               |
| <b>Adolescents: Addition &gt; Control</b> |     |       |          |               |
| Inferior frontal gyrus                    | R   | 44    | 3.73     | 52 10 16      |
|                                           |     |       | 3.65     | 50 20 14      |
| Posterior inferior frontal gyrus          | L   | 44    | 3.15     | -38 4 26      |
| Dorsal ACC                                | R   | 32    | 2.99     | 10 12 42      |
| Insula                                    | R   | 48    | 2.84     | 46 10 2       |
|                                           |     |       | 2.87     | 36 20 -8      |
| Supplementary motor area                  | L   | 6     | 2.80     | -2 18 48      |
| Inferior parietal lobe                    | L   | 7     | 2.80     | -24 -66 48    |
| <b>Adults: Addition &gt; Control</b>      |     |       |          |               |
| Inferior frontal gyrus                    | R   | 44    | 3.00     | 42 12 24      |
|                                           | L   |       | 4.29     | -46 6 28      |
| Posterior inferior frontal gyrus          | L   | 44    | 3.60     | -42 8 36      |
| Dorsal ACC                                | R   | 32    | 3.33     | 8 16 44       |
| Supplementary motor area                  | R   | 6     | 3.00     | 2 18 48       |
| Inferior parietal lobe                    | L   | 40, 7 | 3.58     | -32 -54 36    |
|                                           |     |       | 2.80     | -24 -72 34    |

Notes are same as Table S2

**Table S7: Brain regions showing developmental changes in task-related activation in children, adolescents and adults.**

| <b>Brain regions</b>                                                     | <b>R/L</b> | <b>BA</b> | <b>F values</b> | <b>MNI (x, y, z)</b> |
|--------------------------------------------------------------------------|------------|-----------|-----------------|----------------------|
| Omnibus <i>F</i> contrast: children at Time-2 vs. adolescents vs. adults |            |           |                 |                      |
| <b>Hippocampus</b>                                                       | <b>R</b>   | <b>-</b>  | <b>8.46</b>     | <b>32 -16 -18</b>    |
| Cerebellum                                                               | R          | -         | 8.27            | 14 -30 18            |

Notes are same as in Table S2

**Table S8: Brain regions showing developmental changes in inter-problem multivoxel pattern stability from childhood through adolescence into adulthood.**

| Brain regions                                                                   | R/L      | BA       | <i>F</i> values | MNI (x, y, z)      |
|---------------------------------------------------------------------------------|----------|----------|-----------------|--------------------|
| <b>Omnibus <i>F</i> contrast: children at Time-2, adolescents versus adults</b> |          |          |                 |                    |
| Inferior frontal sulcus                                                         | L        | 44       | 11.21           | -40 16 34          |
| Inferior frontal gyrus                                                          |          | 48       | 12.84           | -54 20 14          |
| Ventral-temporal cortex                                                         | L        | 37       | 14.74           | -42 -38 -16        |
| (fusiform)                                                                      | R        | 19       | 15.69           | 40 -74 -14         |
| Middle temporal gyrus                                                           | R        | 21       | 18.35           | 62 -32 -8          |
| Postcentral gyrus                                                               | L        | 3        | 13.27           | -40 -18 44         |
|                                                                                 |          |          | 8.96            | -46 -22 36         |
| <b>Hippocampus</b>                                                              | <b>L</b> | <b>-</b> | <b>12.68</b>    | <b>-26 -14 -20</b> |
|                                                                                 |          |          | <b>11.64</b>    | <b>-22 -32 -2</b>  |
|                                                                                 | <b>R</b> | <b>-</b> | <b>9.60</b>     | <b>20 -16 -16</b>  |
|                                                                                 |          |          | <b>9.22</b>     | <b>32 -6 -18</b>   |
| Insula                                                                          | L        | 48       | 10.29           | -38 -8 -6          |
| Calcarine sulcus                                                                | R        | 18       | 12.38           | 16 -66 18          |
| Thalamus                                                                        | L        | -        | 12.46           | -20 -30 0          |
|                                                                                 | R        | -        | 9.11            | 10 -22 -2          |
| Midbrain                                                                        | L        | -        | 9.44            | -8 -32 -10         |

Only clusters, significant at a height threshold of  $P < 0.001$  and an extent threshold of  $P < 0.05$  corrected for multiple comparisons, are reported with local maxima in MNI standard space. Other notes are same as Table S3.

**Table S9: Original and matched number of correct problems included in matched multivoxel pattern stability analysis.**

|             | Original<br>(means $\pm$ standard deviations) | Matched in<br>means and standard deviations |
|-------------|-----------------------------------------------|---------------------------------------------|
| Children T1 | 19.35 $\pm$ 3.35                              | 19.35 $\pm$ 3.35                            |
| Children T2 | 22.05 $\pm$ 2.35                              | 19.35 $\pm$ 3.36                            |
| Adolescents | 24.65 $\pm$ 1.42                              | 19.45 $\pm$ 3.63                            |
| Adults      | 25.50 $\pm$ 0.69                              | 19.50 $\pm$ 3.44                            |

**References**

1. Friston, K.J., *et al.* Psychophysiological and modulatory interactions in neuroimaging. *Neuroimage* **6**, 218-229 (1997).
2. Sanchez, C.E., Richards, J.E. & Almlí, C.R. Age-specific MRI templates for pediatric neuroimaging. *Developmental neuropsychology* **37**, 379-399 (2012).
